# Supplementary material
Source: HighWire-hosted journal article supplement (https://bmjopen.bmj.com/content/14/12/e084478)
Supplement: inline-supplementary-material-7 [file inline-supplementary-material-7.pdf]

## EVENT 5: HOUSE CALL 2 – DATA FORM

|                                                                                                                                             |                                                                                                                                                                      |                                                                                                                      |
|---------------------------------------------------------------------------------------------------------------------------------------------|----------------------------------------------------------------------------------------------------------------------------------------------------------------------|----------------------------------------------------------------------------------------------------------------------|
| Household ID: <input type="text"/> <input type="text"/> <input type="text"/> <input type="text"/> <input type="text"/> <input type="text"/> | Date: <input type="text"/> <input type="text"/> / <input type="text"/> <input type="text"/> / <input type="text"/> <input type="text"/><br><i>Ethiopian calendar</i> | Time: <input type="text"/> <input type="text"/> : <input type="text"/> <input type="text"/><br><i>Ethiopian time</i> |
| Household Head Name: _____                                                                                                                  |                                                                                                                                                                      | Activator Name: _____                                                                                                |

### VIDEO DEMO

Age: ☐ ☐ years (enter 01 for age=1, 02 for age=2, etc.)    Gender: ☐ Male   ☐ Female

Put an "X" in the box if the person: (*tick all that apply*)

- ☐ Uses the wash station with tap
- ☐ Uses soap. If yes, which soap was used: ☐ Laundry soap   ☐ Body soap   ☐ Soapy water
- ☐ Is supported by someone (e.g. mother, father, sibling)
- ☐ Washes clearly around the eyes and nose
- ☐ Closes the tap whilst scrubbing his/her face
- ☐ Has hands washed (if face wash is performed by someone other than the child)

### WASH STATION REVIEW

Water container with tap is present:

☐ Yes, inside    ☐ Yes, outside    ☐ Cannot be seen → Ask where the water container is  
Record where it is: \_\_\_\_\_

Family has built a station for their wash station water container:

☐ Yes, suitable height.

☐ Yes, too high → Discuss changing the height so it can be used by more family members.

☐ No → Discuss how they are using the material and how the station could help them.

There is water in the wash station container: ☐ No   ☐ Yes, but no water flows when the tap is open  
☐ Yes, 1/4 full   ☐ Yes, half full or more

The wash station container is functional: ☐ Yes   ☐ No, why: \_\_\_\_\_

There is bar soap at the station: ☐ Yes, in soap dish   ☐ Yes, not in soap dish   ☐ No

There is a soapy water bottle at the station: ☐ Yes, attached to the station   ☐ Yes, not attached   ☐ No

### POSTER AND DAngLER REVIEW

Location of the poster: ☐ On wall, suitable height

☐ On wall, too high → Suggest changing location and explain why

☐ Present, but not visible → Suggest nailing to wall

☐ Not seen in home    ☐ Other: \_\_\_\_\_

Location of the dangler: ☐ Hung. If yes, where: ☐ In the kitchen   ☐ Place people take meals

☐ Present in the house, but not visible → Suggest hanging the dangler

☐ Not seen in home    ☐ Other: \_\_\_\_\_

### WASH STATION CERTIFICATION

Certification sticker has been given to household: ☐ Yes   ☐ No

Certification sticker has been stuck on the wash station container or a dedicated material: ☐ Yes   ☐ No

**Please keep this checklist safe and give it to responsible person at Berhan when you see them.**
